# Supplementary material for: Mediterranean diet adherence and risk of esophageal and gastric cancer subtypes in the Netherlands Cohort Study
Source: PubMed Central journal article supplement (PMC6570688; doi:10.1007/s10120-019-00927-x), 2019-02-15
Supplement: 10120_2019_927_MOESM1_ESM.pdf [file 10120_2019_927_MOESM1_ESM.pdf]

**Mediterranean diet adherence and risk of esophageal and gastric cancer subtypes in the Netherlands Cohort Study**

Gastric Cancer

Maya Schulpen, Petra H. Peeters, Piet A. van den Brandt

Corresponding author: Piet A. van den Brandt, Maastricht University Medical Centre, Department of Epidemiology, P.O. Box 616, 6200 MD Maastricht, the Netherlands. Phone: +31 (0)43 3882361, Fax: +31 (0)43 3884128, E-mail: pa.vandenbrandt@maastrichtuniversity.nl

**Online Resource 1** Age-adjusted associations of aMEDr and mMEDr with the risk of esophageal and gastric cancer subtypes in male and female NLCS participants

|                       | PY <sub>subcohort</sub> | ESCC  |                          | EAC   |                          | GCA   |                          | GNCA  |                          |  |
|-----------------------|-------------------------|-------|--------------------------|-------|--------------------------|-------|--------------------------|-------|--------------------------|--|
|                       |                         | Cases | HR (95% CI) <sup>a</sup> | Cases | HR (95% CI) <sup>a</sup> | Cases | HR (95% CI) <sup>a</sup> | Cases | HR (95% CI) <sup>a</sup> |  |
| <b>Men</b>            |                         |       |                          |       |                          |       |                          |       |                          |  |
| aMEDr                 |                         |       |                          |       |                          |       |                          |       |                          |  |
| 0-3                   | 11889                   | 46    | 1.00                     | 59    | 1.00                     | 71    | 1.00                     | 190   | 1.00                     |  |
| 4-5                   | 12569                   | 25    | 0.52 (0.31 - 0.85)       | 70    | 1.12 (0.78 - 1.61)       | 74    | 0.99 (0.70 - 1.39)       | 155   | 0.78 (0.61 - 0.99)       |  |
| 6-8                   | 4792                    | 5     | 0.26 (0.10 - 0.67)       | 28    | 1.14 (0.71 - 1.83)       | 13    | 0.45 (0.24 - 0.82)       | 45    | 0.57 (0.40 - 0.81)       |  |
| P <sub>trend</sub>    |                         |       | 0.002                    |       | 0.575                    |       | 0.008                    |       | 0.001                    |  |
| Continuous, per 2 pts | 29250                   | 76    | 0.54 (0.40 - 0.72)       | 157   | 1.10 (0.89 - 1.35)       | 158   | 0.83 (0.68 - 1.02)       | 390   | 0.79 (0.69 - 0.90)       |  |
| mMEDr                 |                         |       |                          |       |                          |       |                          |       |                          |  |
| 0-3                   | 10920                   | 39    | 1.00                     | 61    | 1.00                     | 66    | 1.00                     | 156   | 1.00                     |  |
| 4-5                   | 13549                   | 29    | 0.58 (0.36 - 0.96)       | 68    | 0.88 (0.61 - 1.27)       | 75    | 0.90 (0.64 - 1.28)       | 182   | 0.91 (0.71 - 1.16)       |  |
| 6-8                   | 4782                    | 8     | 0.45 (0.21 - 0.99)       | 28    | 1.03 (0.64 - 1.65)       | 17    | 0.58 (0.33 - 1.01)       | 52    | 0.73 (0.52 - 1.03)       |  |
| P <sub>trend</sub>    |                         |       | 0.039                    |       | 0.930                    |       | 0.049                    |       | 0.075                    |  |
| Continuous, per 2 pts | 29250                   | 76    | 0.65 (0.49 - 0.85)       | 157   | 0.99 (0.79 - 1.24)       | 158   | 0.82 (0.66 - 1.01)       | 390   | 0.91 (0.79 - 1.05)       |  |
| <b>Women</b>          |                         |       |                          |       |                          |       |                          |       |                          |  |
| aMEDr                 |                         |       |                          |       |                          |       |                          |       |                          |  |
| 0-3                   | 12254                   | 21    | 1.00                     | 19    | 1.00                     | 15    | 1.00                     | 92    | 1.00                     |  |
| 4-5                   | 15123                   | 27    | 1.07 (0.60 - 1.93)       | 18    | 0.78 (0.40 - 1.50)       | 12    | 0.65 (0.30 - 1.39)       | 71    | 0.64 (0.46 - 0.89)       |  |
| 6-8                   | 6278                    | 9     | 0.89 (0.40 - 1.99)       | 6     | 0.64 (0.25 - 1.62)       | 6     | 0.80 (0.31 - 2.04)       | 33    | 0.74 (0.48 - 1.13)       |  |
| P <sub>trend</sub>    |                         |       | 0.789                    |       | 0.340                    |       | 0.638                    |       | 0.153                    |  |
| Continuous, per 2 pts | 33655                   | 57    | 0.98 (0.70 - 1.36)       | 43    | 0.94 (0.65 - 1.36)       | 33    | 0.81 (0.50 - 1.31)       | 196   | 0.77 (0.63 - 0.94)       |  |
| mMEDr                 |                         |       |                          |       |                          |       |                          |       |                          |  |
| 0-3                   | 11675                   | 17    | 1.00                     | 17    | 1.00                     | 9     | 1.00                     | 75    | 1.00                     |  |
| 4-5                   | 16510                   | 31    | 1.32 (0.72 - 2.41)       | 19    | 0.80 (0.41 - 1.56)       | 18    | 1.42 (0.64 - 3.19)       | 91    | 0.88 (0.63 - 1.21)       |  |
| 6-8                   | 5470                    | 9     | 1.19 (0.52 - 2.72)       | 7     | 0.90 (0.37 - 2.21)       | 6     | 1.45 (0.51 - 4.09)       | 30    | 0.89 (0.57 - 1.40)       |  |
| P <sub>trend</sub>    |                         |       | 0.659                    |       | 0.812                    |       | 0.477                    |       | 0.597                    |  |
| Continuous, per 2 pts | 33655                   | 57    | 1.17 (0.81 - 1.67)       | 43    | 0.92 (0.62 - 1.37)       | 33    | 1.03 (0.67 - 1.58)       | 196   | 0.95 (0.78 - 1.16)       |  |

aMEDr alternate Mediterranean diet score without the alcohol component, mMEDr modified Mediterranean diet score without the alcohol component, NLCS Netherlands Cohort Study, ESCC esophageal squamous cell carcinoma, EAC esophageal adenocarcinoma, GCA gastric cardia adenocarcinoma, GNCA gastric non-cardia adenocarcinoma, PY<sub>subcohort</sub> person-years in the subcohort, HR hazard ratio, CI confidence interval, pts points

<sup>a</sup> Adjusted for age at baseline (years).
